# Supplementary material for: A Keggin-type polyoxomolybdate-based crystalline material formed by hydrothermal transformation: photo/electro-catalytic properties and mechanism study
Source: Royal Society of Chemistry journal article supplement (doi:10.1039/d2ce01301k), 2022-01-01
Supplement: d2ce01301k1.pdf [file d2ce01301k1.pdf]

# Supporting Information

## **A Keggin-type polyoxomolybdate-based crystalline material formed by hydrothermal transformation: photo/electrocatalytic properties and mechanism study**

Peisen Wang,<sup>‡a</sup> Aadil Nabi Chishti,<sup>‡a</sup> Peng Chen,<sup>a</sup> Zengxiang Lv,<sup>a</sup> Yaya Tan,<sup>a</sup> Hanzhi Zhang,<sup>a</sup> Junjie Zha,<sup>a</sup> Zhiyuan Ma,<sup>a</sup> Lubin Ni,<sup>\*a</sup> Lu-nan Zhang<sup>\*a</sup> and Yongge Wei<sup>\*bc</sup>

<sup>a</sup> School of Chemistry and Chemical Engineering, Yangzhou University, Yangzhou 225002, China  
E-mail: [lbni@yzu.edu.cn](mailto:lbni@yzu.edu.cn), [zhangln@yzu.edu.cn](mailto:zhangln@yzu.edu.cn), [yonggewei@mail.tsinghua.edu.cn](mailto:yonggewei@mail.tsinghua.edu.cn)

<sup>b</sup> Key lab of Organic Optoelectronics & Molecular Engineering of Ministry of Education, Department of Chemistry, Tsinghua University, Beijing 100084, China.

<sup>c</sup> State Key Laboratory of Natural and Biomimetic Drugs, Peking University, Beijing 100191, China.

<sup>‡</sup>These authors contributed equally to this work.

### **Experimental Section**

#### **1. Physical measurements**

Fourier-transform infrared (FT-IR) spectra were obtained with a Cary 5000 FT-IR spectrometer using KBr particles in the range of 400-4000  $\text{cm}^{-1}$ . Powder XRD (PXRD) patterns ( $2\theta = 5\text{-}50^\circ$ ) were collected at room temperature using a Bruker D8 Advance XRD diffractometer at 40 kV and 40 mA with Cu  $K\alpha$  ( $\lambda = 1.5406 \text{ \AA}$ ) radiation. Using a TG 209F3 thermogravimetric analyzer from the German Netzsch Group, under air atmosphere with a heating rate of  $10 \text{ K} \cdot \text{min}^{-1}$  in the temperature region of 30-900  $^\circ\text{C}$ .

## 2. Single-crystal structure determination

Single crystal X-ray diffraction data of complex **1** were collected at 293 K using a sealed Tube Bruker Smart APEX II CCD (Mo K $\alpha$  radiation,  $\lambda = 0.71073$  Å). All the non-H atoms were determined by direct methods and refined anisotropically by full-matrix least-squares techniques based on  $F^2$  by using the SHELXTL software package and Olex 2 software.<sup>1,2</sup> More details of X-ray structure analysis are given in **Table S1**. The selected bond lengths and angles are listed in **Table S2**.

## 3. Photocatalytic process

The photocatalytic process was proceeded in a water-cooling quartz container. 50 mg of complex **1** was dispersed in 100 mL of 10 mg L<sup>-1</sup> MB aqueous solution and magnetically stirred for about 30 min to ensure the adsorption-desorption equilibrium in the dark. After the dark reaction, 500  $\mu$ L of H<sub>2</sub>O<sub>2</sub> was added into the above solution, and the mixture was exposed to a UV lamp with continuous stirring. 2.0 mL samples were collected after every 4 minutes and analyzed by using a UV-Vis spectrophotometer.

## 4. Electrochemical measurements

Electrochemical experiments were carried out using an electrochemical workstation (CHI760E, Chen Hua, China). A typical three electrode system was established: a modified glassy carbon working electrode (GCE, d = 3mm), a saturated calomel electrode (SCE) reference electrode, and a Pt wire counter electrode. The working electrode was prepared as follows: 4 mg of complex **1** and 1 mg of Ketjenblack carbon were dispersed in 1 mL of ethanol and thoroughly ground in a mortar. The mixture was completely transferred into a 1.5 mL centrifuge tube, to which 50  $\mu$ L of Nafion solution (5 wt%) was added, and then the mixture was further sonicated for 1 h to ensure fully

dispersed. Afterward, 5  $\mu\text{L}$  of the obtained homogeneous ink was dropped onto the surface of a bare GCE. Finally, the electrode was dried in the air.

**Table S1.** Crystallographic data and structural correction parameters.

| Complex                                                                                                     | 1                                                                                  |
|-------------------------------------------------------------------------------------------------------------|------------------------------------------------------------------------------------|
| Empirical formula                                                                                           | C <sub>60</sub> Cu <sub>6</sub> SiMo <sub>18</sub> N <sub>12</sub> O <sub>62</sub> |
| Formula weight                                                                                              | 4096.97                                                                            |
| Temperature, K                                                                                              | 293(K)                                                                             |
| Wavelength, Å                                                                                               | Mo K $\alpha$ (0.71073)                                                            |
| Crystal system                                                                                              | Monoclinic                                                                         |
| Space group                                                                                                 | <i>P21/c</i>                                                                       |
| a, Å                                                                                                        | 13.9435(8)                                                                         |
| b, Å                                                                                                        | 20.0147(12)                                                                        |
| c, Å                                                                                                        | 17.2063(11)                                                                        |
| $\alpha$ , °                                                                                                | 90                                                                                 |
| $\beta$ , °                                                                                                 | 93.972                                                                             |
| $\gamma$ , °                                                                                                | 90                                                                                 |
| <i>V</i> , Å <sup>3</sup>                                                                                   | 4790.3(5)                                                                          |
| <i>Z</i>                                                                                                    | 2                                                                                  |
| <i>D</i> (calculated), g/cm <sup>3</sup>                                                                    | 2.840                                                                              |
| Abs. coeff., mm <sup>-1</sup>                                                                               | 3.695                                                                              |
| <i>F</i> (000)                                                                                              | 3848.0                                                                             |
| Crystal size, mm                                                                                            | 0.18 x 0.10 x 0.08                                                                 |
| $\theta$ range for data collection, °                                                                       | 3.126 ~ 54.206                                                                     |
| Reflections collected / unique / <i>R</i> <sub>int</sub>                                                    | 44626/10907/0.0486                                                                 |
| Data / restraints / parameters                                                                              | 10471/0/739                                                                        |
| GOF on <i>F</i> <sup>2</sup>                                                                                | 1.156                                                                              |
| Final <i>R</i> indices <i>R</i> <sub>1</sub> , <i>wR</i> <sub>2</sub> [ <i>I</i> > 2 $\sigma$ ( <i>I</i> )] | 0.0674, 0.1617                                                                     |
| <i>R</i> indices <i>R</i> <sub>1</sub> , <i>wR</i> <sub>2</sub> [all data]                                  | 0.0766, 0.1665                                                                     |
| Largest diff. peak and hole, e. Å <sup>-3</sup>                                                             | 2.00 /-1.53                                                                        |

$$R_1 = \sum(F_o - F_c) / \sum F_o \text{ and } wR_2 = \{ \sum w(F_o^2 - F_c^2)^2 / \sum w(F_o^2)^2 \}^{1/2}$$

**Table S2.** Selected bond lengths (Å) and selected angles (°) for complex **1**.

|                          |           |                           |           |
|--------------------------|-----------|---------------------------|-----------|
| Mo(1)-O(24)              | 1.728(8)  | Mo(1)-O(29) <sup>1</sup>  | 2.131(6)  |
| Mo(1)-O(25)              | 1.772(7)  | Mo(1)-O(27) <sup>1</sup>  | 2.186(7)  |
| Mo(1)-O(23)              | 1.773(7)  | Mo(1)-O(28)               | 2.219(7)  |
| Cu(1)-O(25)              | 1.924(7)  | Cu(2)-O(30)               | 1.974(7)  |
| Cu(1)-O(26)              | 1.980(7)  | Cu(3)-O(23)               | 1.932(7)  |
| Cu(1)-N(3)               | 1.979(9)  | Cu(3)-O(22)               | 1.942(7)  |
| Cu(1)-N(4)               | 1.983(9)  | Cu(3)-N(2)                | 1.985(8)  |
| Cu(1)-O(32) <sup>1</sup> | 2.417(7)  | Cu(3)-N(1)                | 1.988(9)  |
| Cu(2)-O(31)              | 1.917(7)  | Cu(3)-O(8)                | 2.375(9)  |
| Cu(2)-N(5)               | 1.970(9)  | Si (1)-O(11) <sup>2</sup> | 1.638(14) |
| Si(1)-O(3) <sup>2</sup>  | 1.596(14) | Si (1)-O(10)              | 1.647(14) |
| Si(1)-O(3)               | 1.596(14) | Si (1)-O(10) <sup>2</sup> | 1.647(14) |
| Si(1)-O(11)              | 1.638(14) | Mo(9)-O(21) <sup>2</sup>  | 2.010(9)  |
| Mo(6)-O(2) <sup>2</sup>  | 1.971(9)  | Mo(3)-O(27) <sup>1</sup>  | 2.170(6)  |
| Mo(5)-O(3) <sup>2</sup>  | 2.397(15) | Mo(1)-O(27) <sup>1</sup>  | 2.186(7)  |
| Mo(6)-O(3) <sup>2</sup>  | 2.438(13) | Mo(1)-O(29) <sup>1</sup>  | 2.131(6)  |
| Mo(6)-O(6) <sup>2</sup>  | 2.036(10) | Mo(2)-O(29) <sup>1</sup>  | 2.240(7)  |
| Mo(8)-O(7) <sup>2</sup>  | 2.356(14) | Cu(1)-O(32) <sup>1</sup>  | 2.417(7)  |
| N(1)-C(30)               | 1.340(14) | N(2)-C(25)                | 1.350(13) |
| N(1)-C(26)               | 1.365(13) | N(3)-C(10)                | 1.331(17) |
| N(2)-C(21)               | 1.348(15) | N(3)-C(6)                 | 1.366(15) |
| C(1)-C(2)                | 1.391(18) | C(3)-C(4)                 | 1.39(3)   |
| C(2)-C(3)                | 1.38(3)   | C(4)-C(5)                 | 1.394(18) |
| C(5)-C(6)                | 1.466(17) | C(6)-C(7)                 | 1.386(16) |

Symmetry transformations used to generate equivalent atoms: <sup>1</sup>-x+1, -y+1, -z+2; <sup>2</sup> -x, -y+1, -z+1

**Table S3.** Bond valence calculations for complex **1**.

| Complex                                                                                                            | Atom | N  | $\sum S_{ij}$ | $\Delta$ |
|--------------------------------------------------------------------------------------------------------------------|------|----|---------------|----------|
| [(SiMo <sub>12</sub> O <sub>40</sub> )Cu <sub>6</sub> (2,2'-bipy) <sub>6</sub> (Mo <sub>6</sub> O <sub>22</sub> )] | Si   | 4+ | 3.815         | 0.185    |
|                                                                                                                    | Mo1  | 6+ | 5.945         | 0.055    |
|                                                                                                                    | Mo2  | 6+ | 5.983         | 0.017    |
|                                                                                                                    | Mo3  | 6+ | 6.047         | 0.047    |
|                                                                                                                    | Mo4  | 6+ | 6.614         | 0.614    |
|                                                                                                                    | Mo5  | 6+ | 6.773         | 0.773    |
|                                                                                                                    | Mo6  | 6+ | 6.734         | 0.734    |
|                                                                                                                    | Mo7  | 6+ | 6.345         | 0.345    |
|                                                                                                                    | Mo8  | 6+ | 6.479         | 0.479    |
|                                                                                                                    | Mo9  | 6+ | 6.600         | 0.600    |

**Table S4.** Comparison of photo/electro- performance for complex **1** with other polyoxometalate-based catalysts.

| catalyst                    | Time(min) | CAT <sup>a</sup> (%) | Reference        |
|-----------------------------|-----------|----------------------|------------------|
| TMSP-1                      | □90       | -                    | 3                |
| TMSP-2                      | □90       | -                    | 3                |
| [Cu <sup>II</sup> Lo]-POM-1 | □60       | -                    | 4                |
| [Cu <sup>II</sup> Lo]-POM-2 | 60        | -                    | 4                |
| Cu-PW <sub>12</sub>         | □120      | -                    | 5                |
| Cu-SiW <sub>12</sub>        | □120      | -                    | 5                |
| Cu-PMo <sub>12</sub>        | □120      | -                    | 5                |
| Cu-PW <sub>12</sub>         | -         | < 20                 | 6                |
| Cu-POMOF                    | -         | < 20                 | 7                |
| Cu-POM                      | -         | < 30                 | 8                |
| <b>Complex 1</b>            | 24        | 33.2                 | <b>This work</b> |

<sup>a</sup> represents the CAT at c(NO<sub>2</sub><sup>-</sup>)=10mM.

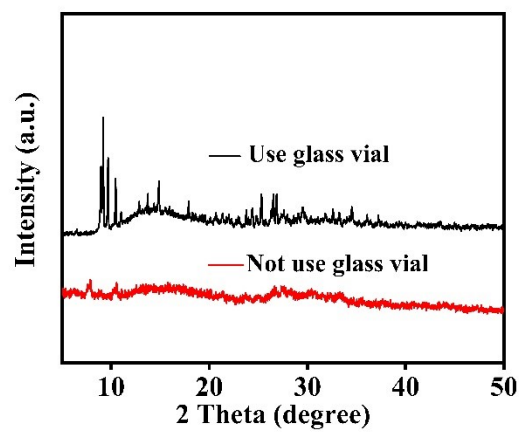

**Fig S1.** XRD patterns of complex **1** (use glass vials) and green precipitate (not use glass vials).

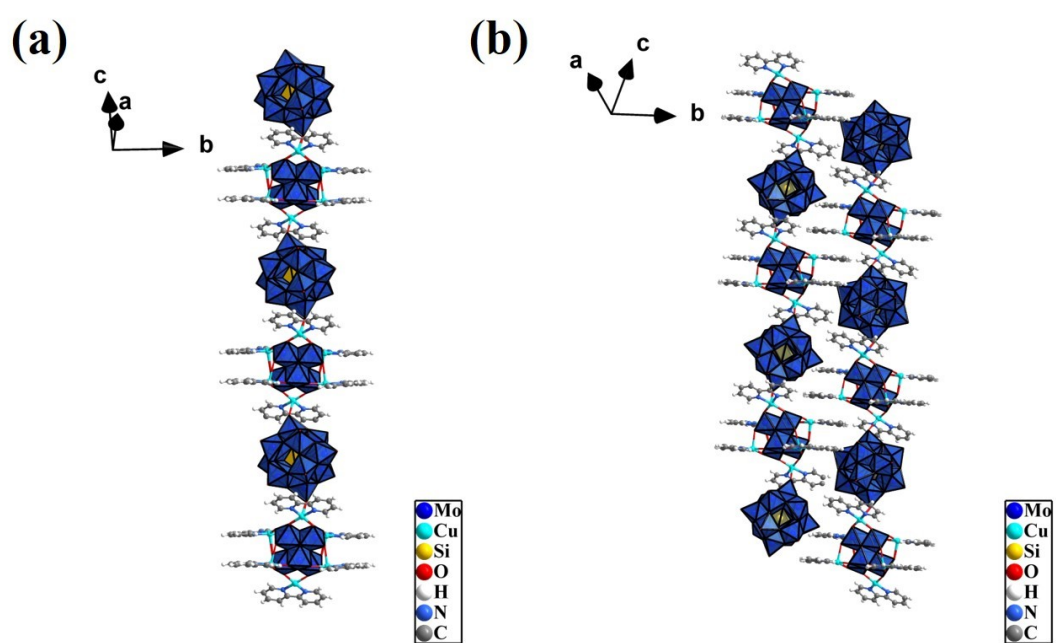

**Fig S2.** Infinite linear chain (a) and  $\pi$ - $\pi$  interactions (b) of complex **1**.



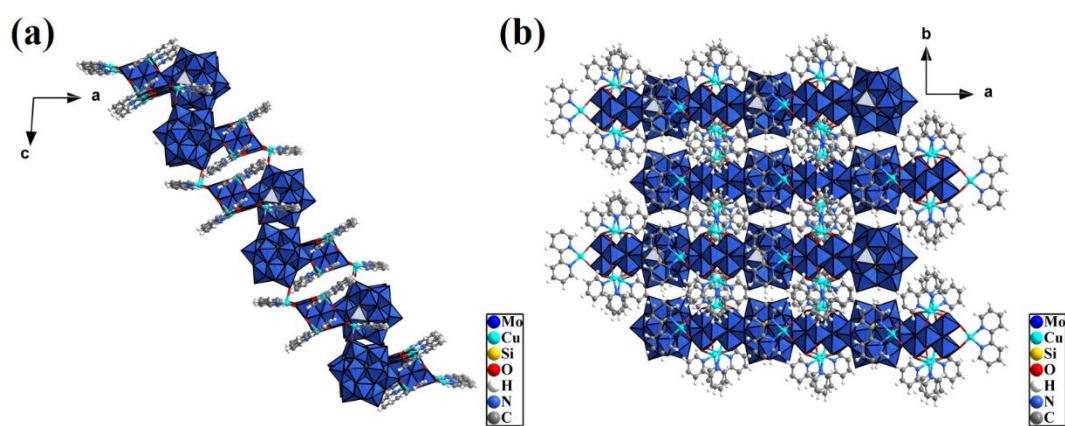

**Fig S3.** Three-dimensional stacking diagram of complex 1 along the b-axis (b) and the c-axis (c).

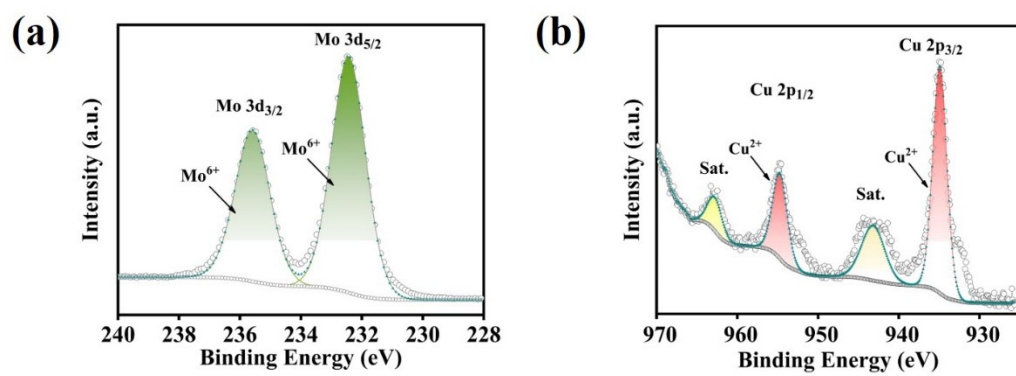

Fig S4. a) Mo 3d and b) Cu 2p XPS spectra of complex 1.

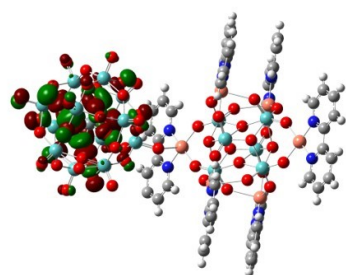

HOMO-1

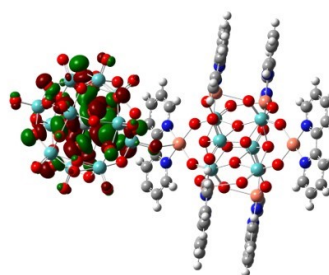

HOMO-2

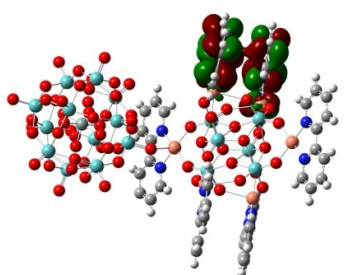

LUMO+1

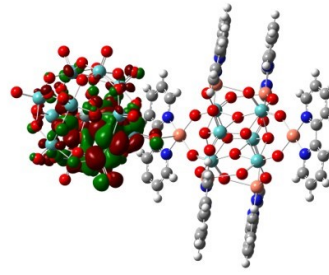

LUMO+2

**Fig S5.** HOMO's and LUMO's of complex 1.

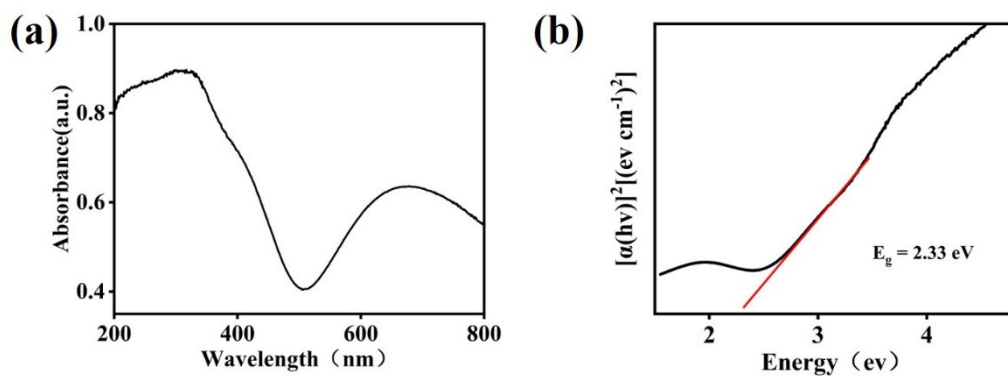

**Fig S6.** Solid state UV/vis spectrum (a) and diffuse reflection spectra of Kubelka–Munk (K-M) function versus energy (eV) of complex **1**.

### Optical Band Gaps

To evaluate the semiconductor behaviors and photocatalytic activities of complex **1**, the diffuse reflection spectra of complex **1** were carried out in the crystalline state at room temperature (**Fig. S3a**). The band gaps ( $E_g$ ) of complex **1** were obtained from the Kubelka–Munk (K-M) function  $F$  vs  $E$ , which are estimated to be 2.33 eV (**Fig. S3b**). The band gap values indicate that complex **1** may respond to UV irradiation and have the potential capacity for photocatalytic reactions.<sup>9,10</sup>

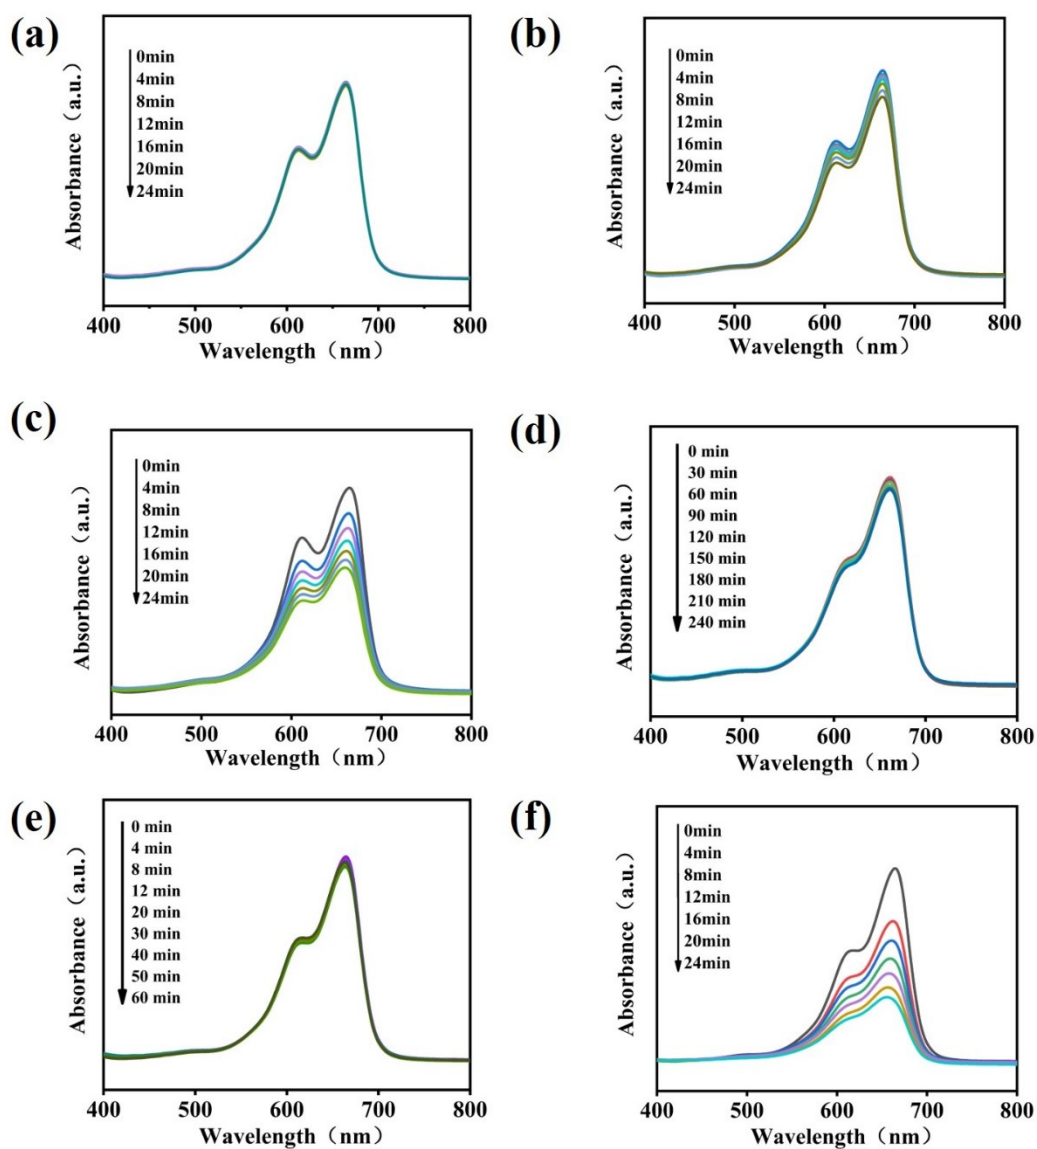

**Fig S7.** (a) Photocatalytic decomposition rate of the blank MB aqueous solution; Photocatalytic decomposition rate of the MB solution containing (b) complex 1 without H<sub>2</sub>O<sub>2</sub>; (c) H<sub>2</sub>O<sub>2</sub> without complex 1; (d) complex 1 and H<sub>2</sub>O<sub>2</sub> under dark room; (e) complex 1 in an oxygen atmosphere; (f) Cu<sup>2+</sup>

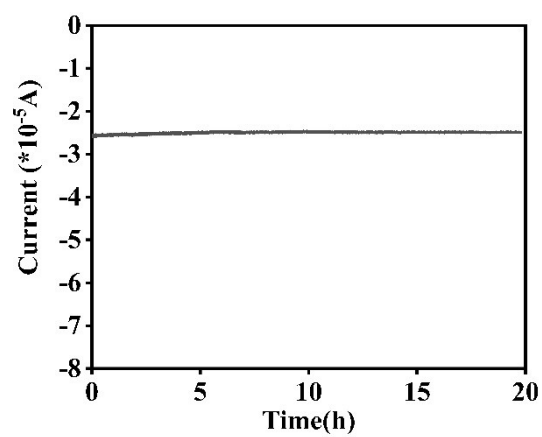

**Fig S8.** The Amperometric i-t curve of complex **1** in 0.1 M H<sub>2</sub>SO<sub>4</sub> + 0.5 M Na<sub>2</sub>SO<sub>4</sub> aqueous solution at -0.19V versus SCE.

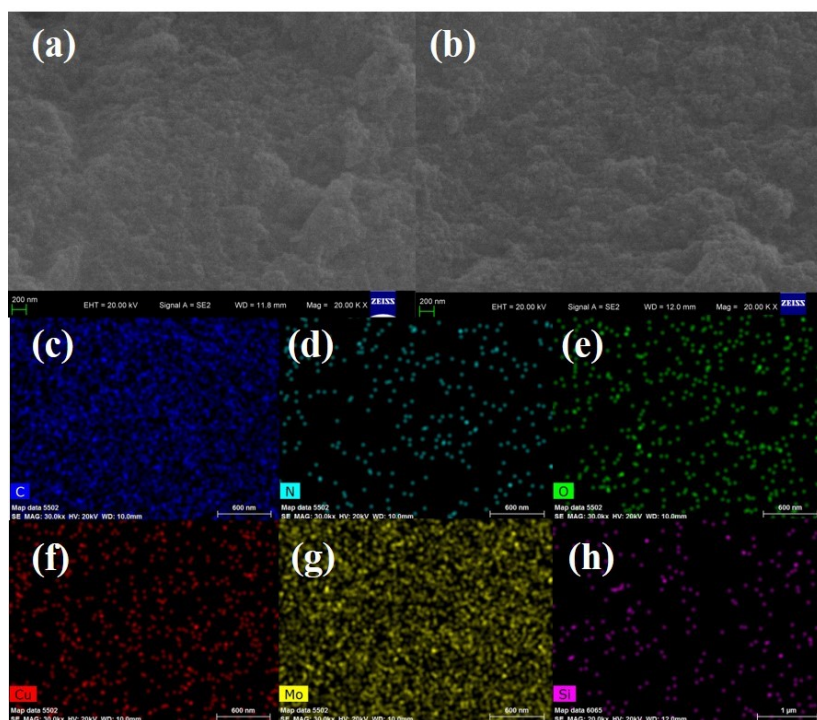

**Fig S9.** (a-b) SEM images of the substance before and after electrolysis. (c-h) Corresponding elemental mapping images of complex **1**.

## References:

1. G.M. Sheldrick. *Acta Cryst.*, 2015, **71**, 3-8.
2. Dolomanov, L.J. Bourhis, R.J. Gildea, J.A.K. Howard and H. Puschmann, *J. Appl. Cryst.*, 2009, **42**, 339-341.
3. J.J. Sun, Y.L. Wang and G.Y. Yang. *CrystEngComm*, 2020, **22**, 8387-8393.
4. L.J. Xu, W.Z. Zhou, L.Y. Zhang, B. Li, H.Y. Zang, Y.H. Wang and Y.G. Li, *CrystEngComm*, 2015, **17**, 3708-3714.
5. S.U. Khan, M. Akhtar, F.U. Khan, J. Peng, A. Hussain, H.F. Shi, J. Du, G. Yan and Y.G. Li, *J. Coord. Chem.*, 2018, **71**, 16-18.
6. Y. Hou, Y. Niu, C.J. Zhang, H.J. Pang and H.Y. Ma, *J. Chem. Sci.*, 2017, **129**, 1639-1645.
7. W.L. Sun, S.B. Li, H.Y. Ma, H.J. Pang, L. Zhang and Z.F. Zhang, *RSC Adv.*, 2014, **4**, 24755-24761.
8. J.W. Zhao, D.Y. Shi, L.J. Chen, P.T. Ma, J.P. Wang, J. Zhang and J.Y. Niu, *Cryst. Growth Des.*, 2013, **13**, 4368-4377.
9. T. Wen, D.X. Zhang and J. Zhang. *Inorg. Chem.*, 2013, **52**, 12-14.
10. W.Q. Kan, B. Liu, J. Yang, Y.Y. Liu and J.F. Ma, *Cryst. Growth Des.*, 2012, **12**, 2288-2298.
